# Supplementary material
Source: HighWire-hosted journal article supplement (https://casereports.bmj.com/highwire/filestream/227333/field_highwire_adjunct_files/0/bcr-2020-238957supp001_data_supplement.pdf)
Supplement: bcr-2020-238957supp001_data_supplement.pdf [file bcr-2020-238957supp001_data_supplement.pdf]

**Supplementary table 1:** Characteristics of 4 neurodegenerative disease with possible psychiatric manifestations as a prodrome

|                              |                    | <b>Binswanger Disease (BD)</b>                                                                                                                                                                                                            | <b>Alzheimer's Disease (AD)</b>                                                                                                                                                                            | <b>Argyrophilic Grain Disease (AGD)</b>                                                                                                                                                 | <b>Dementia with Lewy Bodies (DLB)</b>                                                                                                                                                                                                                                                                                           |
|------------------------------|--------------------|-------------------------------------------------------------------------------------------------------------------------------------------------------------------------------------------------------------------------------------------|------------------------------------------------------------------------------------------------------------------------------------------------------------------------------------------------------------|-----------------------------------------------------------------------------------------------------------------------------------------------------------------------------------------|----------------------------------------------------------------------------------------------------------------------------------------------------------------------------------------------------------------------------------------------------------------------------------------------------------------------------------|
| <b>Prevalence</b>            |                    | Variable 1-5 % (1)                                                                                                                                                                                                                        | First leading cause of dementia (2)                                                                                                                                                                        | Around 5% (3)                                                                                                                                                                           | 10 % (2)                                                                                                                                                                                                                                                                                                                         |
| <b>Risk Factors</b>          |                    | HTN, DM (4)                                                                                                                                                                                                                               | Age; genetics (Apo-e4; APP, PSEN1 and 2); family history of dementia (5)                                                                                                                                   | Age (3)                                                                                                                                                                                 | Genetics, age                                                                                                                                                                                                                                                                                                                    |
| <b>Age of onset</b>          |                    | ≥ 5 <sup>th</sup> decade (1)                                                                                                                                                                                                              | 65 (5)                                                                                                                                                                                                     | 8 <sup>th</sup> decade (6, 7)                                                                                                                                                           | 6 <sup>th</sup> decade (8)                                                                                                                                                                                                                                                                                                       |
| <b>Clinical Presentation</b> | <b>Motor</b>       | Extrapyramidal, pyramidal and cerebellar signs, Pseudobulbar signs (4)                                                                                                                                                                    | Pyramidal and extrapyramidal, myoclonus, seizures (late onset)(5)                                                                                                                                          | -                                                                                                                                                                                       | Parkinsonism, Brady and akinesia, limb rigidity, and gait disorder (8, 9)                                                                                                                                                                                                                                                        |
|                              | <b>Cognitive</b>   | Confusion, impaired judgement, executive dysfunction more prominent than in AD, impaired processing speed, memory dysfunction less common (4)                                                                                             | Specific clinical phenotype of an early and significant episodic memory impairment (10), executive function and judgement impairment (5)                                                                   | No distinctive clinical or imaging phenotype (11) Mild Cognitive impairment most commonly (11), Amnesia (6)                                                                             | Fluctuations in cognition and levels of alertness; non amnesic cognitive impairment, (8, 9)                                                                                                                                                                                                                                      |
|                              | <b>Psychiatric</b> | Affective disorders (depression mainly), personality changes, late onset paranoid psychosis (1, 12)                                                                                                                                       | Apathy, social disengagement, irritability, aggression, psychosis (5)                                                                                                                                      | Emotional and personality changes, late onset schizophrenia and delusional disorder (11), dysphoria, irritability, agitation, apathy (6), post stroke depression, bipolar disorder (13) | REM sleep behaviors disorder, visual hallucinations, depression, delirium (8, 9, 14)                                                                                                                                                                                                                                             |
|                              | <b>Others</b>      | Pseudobulbar signs, urinary incontinence (4)                                                                                                                                                                                              | -                                                                                                                                                                                                          | -                                                                                                                                                                                       | Orthostatic hypotension, constipation, hyposmia (9)                                                                                                                                                                                                                                                                              |
| <b>Diagnosis</b>             |                    | Rosenberg criteria:<br>1- presence of clinical criteria (HTN, DM, hyperreflexia, gait imbalance 2- executive dysfunction on neuropsychological testing 3- Metabolite in WM, 4- Inflammation and Blood Brain Barrier 5- Ruling out AD (15) | Clinical phenotype + One of the following:<br>decreased Aβ1–42 together with increased T-tau or P-tau in CSF, or Increased tracer retention on amyloid PET, or AD autosomal dominant mutation present (10) | Postmortem (16)                                                                                                                                                                         | Probable DLB: presence of at least one central features (Severe progressive functionally impairing dementia, and deficits on tests of attention/ executive function and visuospatial) + at least one other features either core (fluctuating cognition, recurrent visual hallucinations, spontaneous parkinsonism) or suggestive |

|                                            |                                                                                                                                                                   |                                                                                            |                                                                                                                  |                                                                                                                                                |
|--------------------------------------------|-------------------------------------------------------------------------------------------------------------------------------------------------------------------|--------------------------------------------------------------------------------------------|------------------------------------------------------------------------------------------------------------------|------------------------------------------------------------------------------------------------------------------------------------------------|
|                                            |                                                                                                                                                                   |                                                                                            |                                                                                                                  | features (REM sleep behaviors disorder, severe sensitivity to antipsychotics, low dopamine transporter uptake in the basal ganglia). (8, 9)    |
| <b>Imaging</b>                             | Deep and periventricular WM hyperintensities, Prominent frontal and to a lesser extent temporo-parietal atrophy, lacunar infarcts, and subcortical bleeds (4, 17) | Generalized and focal atrophy; Reduced hippocampal volume; Medial temporal lobe atrophy(5) | Unchanged, or mild diffuse or fronto-temporal cortical atrophy<br>NO obvious atrophy of medial temporal lobe (3) | Diffuse pattern of global grey matter atrophy, Loss of parieto-occipital white matter integrity, relatively preserved medial temporal lobe (8) |
| <b>Pathognomonic Pathological findings</b> | arteriolosclerosis, lipohyalinosis, and fibrinoid necrosis, bystander inflammatory demyelination (15)                                                             | Neurofibrillary tangles; senile plaques (18)                                               | Argyrophilic grains (Gallyas positive, Tau positive) Tauopathy? (3)                                              | $\alpha$ -synuclein neuronal inclusions (8)                                                                                                    |

### References:

1. Babikian V, Ropper AH. Binswanger's disease: a review. *Stroke*. 1987;18(1):2-12.
2. Stevens T, Livingston G, Kitchen G, Manela M, Walker Z, Katona C. Islington study of dementia subtypes in the community. *The British journal of psychiatry : the journal of mental science*. 2002;180:270-6.
3. Tolnay M, Clavaguera F. Argyrophilic grain disease: a late-onset dementia with distinctive features among tauopathies. *Neuropathology*. 2004;24(4):269-83.
4. Huisa BN, Rosenberg GA. Binswanger's disease: toward a diagnosis agreement and therapeutic approach. *Expert review of neurotherapeutics*. 2014;14(10):1203-13.
5. Kumar A, Sidhu J, Goyal A, Tsao JW. *Alzheimer Disease*. StatPearls. Treasure Island (FL): StatPearls Publishing

Copyright © 2020, StatPearls Publishing LLC.; 2020.

6. Togo T, Isojima D, Akatsu H, Suzuki K, Uchikado H, Katsuse O, et al. Clinical features of argyrophilic grain disease: a retrospective survey of cases with neuropsychiatric symptoms. *Am J Geriatr Psychiatry*. 2005;13(12):1083-91.
7. Josephs KA, Whitwell JL, Parisi JE, Knopman DS, Boeve BF, Geda YE, et al. Argyrophilic grains: a distinct disease or an additive pathology? *Neurobiol Aging*. 2008;29(4):566-73.
8. Walker Z, Possin KL, Boeve BF, Aarsland D. Lewy body dementias. *Lancet (London, England)*. 2015;386(10004):1683-97.
9. Donaghy PC, McKeith IG. The clinical characteristics of dementia with Lewy bodies and a consideration of prodromal diagnosis. *Alzheimer's Research & Therapy*. 2014;6(4):46.
10. Dubois B, Feldman HH, Jacova C, Hampel H, Molinuevo JL, Blennow K, et al. Advancing research diagnostic criteria for Alzheimer's disease: the IWG-2 criteria. *Lancet Neurol*. 2014;13(6):614-29.
11. Rodriguez RD, Grinberg LT. Argyrophilic grain disease: An underestimated tauopathy. *Dement Neuropsychol*. 2015;9(1):2-8.
12. Caplan LR. Binswanger's disease--revisited. *Neurology*. 1995;45(4):626.

13. Yokota O, Miki T, Ikeda C, Nagao S, Takenoshita S, Ishizu H, et al. Neuropathological comorbidity associated with argyrophilic grain disease. *Neuropathology : official journal of the Japanese Society of Neuropathology*. 2018;38(1):82-97.
14. McKeith IG, Ferman TJ, Thomas AJ, Blanc F, Boeve BF, Fujishiro H, et al. Research criteria for the diagnosis of prodromal dementia with Lewy bodies. *Neurology*. 2020;94(17):743.
15. Rosenberg GA, Wallin A, Wardlaw JM, Markus HS, Montaner J, Wolfson L, et al. Consensus statement for diagnosis of subcortical small vessel disease. *Journal of Cerebral Blood Flow & Metabolism*. 2016;36(1):6-25.
16. Ferrer I, Barrachina M, Tolnay M, Rey MJ, Vidal N, Carmona M, et al. Phosphorylated protein kinases associated with neuronal and glial tau deposits in argyrophilic grain disease. *Brain Pathol*. 2003;13(1):62-78.
17. Jung WB, Mun CW, Kim YH, Park JM, Lee BD, Lee YM, et al. Cortical atrophy, reduced integrity of white matter and cognitive impairment in subcortical vascular dementia of B inswanger type. *Psychiatry and clinical neurosciences*. 2014;68(12):821-32.
18. Perl DP. Neuropathology of Alzheimer's disease. *Mt Sinai J Med*. 2010;77(1):32-42.
